Manuscript for

# Auditory Steady-State Responses During And After A Stimulus: Cortical Sources, and the Influence of Attention and Musicality

Cassia Low Manting<sup>1,2\*</sup>, Balazs Gulyas<sup>2,3</sup>, Fredrik Ullén<sup>4</sup> and Daniel Lundqvist<sup>1,2</sup>

<sup>1</sup> NatMEG, Department of Clinical Neuroscience, Karolinska Institutet, Stockholm, Sweden

<sup>2</sup> Cognitive Neuroimaging Centre (CoNiC), Lee Kong Chien School of Medicine, Nanyang Technological University, Singapore

<sup>3</sup> Department of Clinical Neuroscience, Karolinska Institutet, Stockholm, Sweden

<sup>4</sup> Department of Neuroscience, Karolinska Institutet, Stockholm, Sweden

\*corresponding author

E-mail: [mtlow1@e.ntu.edu.sg](mailto:mtlow1@e.ntu.edu.sg), [cassia@natmeg.se](mailto:cassia@natmeg.se)

## Keywords

ASSR, frequency-tagging, selective auditory attention, amplitude-modulation, post-stimulus, music

## Abstract

The auditory steady-state response (ASSR) is an oscillatory brain response generated by periodic auditory stimuli and originates mainly from the temporal auditory cortices. Recent data show that while the auditory cortices are indeed strongly activated by the stimulus when it is present (ON ASSR), the anatomical distribution of ASSR sources involves also parietal and frontal cortices, indicating that the ASSR is a more complex phenomenon than previously believed. Furthermore, while the ASSR typically continues to oscillate even after the stimulus has stopped (OFF ASSR), very little is known about the characteristics of the OFF ASSR and how it compares to the ON ASSR. Here, we assessed whether the OFF and ON ASSR powers are modulated by the stimulus properties (i.e. volume and pitch), selective attention, as well as individual musical sophistication. We also investigated the cortical source distribution of the OFF ASSR using a melody tracking task, in which attention was directed between uniquely amplitude-modulated melody streams that differed in pitch. The ON and OFF ASSRs were recorded with magnetoencephalography (MEG) on a group of participants varying from low to high degree of musical sophistication. Our results show that the OFF ASSR is distinctly different from the ON ASSR in nearly every aspect. While the ON ASSR was modulated by the stimulus properties and selective attention, the OFF ASSR was not influenced by any of these factors. Furthermore, while the ON ASSR was generated primarily from temporal sources, the OFF ASSR originated mainly from the frontal cortex. These findings challenge the notion that the OFF ASSR is merely a continuation of the ON ASSR. Rather, they suggest that the OFF ASSR is an internally-driven signal that develops from an initial sensory processing state (ON ASSR), with both types of ASSRs clearly differing in cortical representation and character. Furthermore, our results show that the ON ASSR power was enhanced by selective attention at cortical sources within each of the bilateral frontal, temporal, parietal and insular lobes. Finally, the ON ASSR proved sensitive to musicality, demonstrating positive correlations between musical sophistication and ASSR power, as well as with the degree of attentional ASSR modulation at the left and right parietal cortices. Taken together, these results show new aspects of the ASSR response, and demonstrate its usefulness as an effective tool for analysing how selective attention interacts with individual abilities in music perception.

## 1 1. Introduction

2 The auditory steady-state response (ASSR) is an oscillatory neural response that phase-locks to the presentation rate of a  
3 repeated auditory stimulus (e.g. a chain of clicks), or the modulation frequency ( $f_m$ ) of an amplitude- and/or frequency-  
4 modulated sound. It can be recorded using electro- and magnetoencephalography (EEG, MEG)<sup>1-2</sup> and exhibits a maximum  
5 cortical power response at approximately 40 Hz in humans<sup>1, 3</sup>. The ASSR stabilizes at around 200 ms from when the stimulus  
6 begins, and continues to oscillate at a constant phase throughout the duration of the stimulus<sup>4</sup>. Since the ASSR's oscillation  
7 frequency is equal to the stimulus'  $f_m$ , the ASSR power at this specific frequency can be extracted from MEG or EEG data in  
8 a straightforward manner using power spectral density (PSD) estimation techniques such as Fourier transformation. This offers  
9 a simple, efficient and precise method for separating neural responses to multiple simultaneously-presented auditory stimuli  
10 that are each modulated at a different  $f_m$ <sup>3, 5</sup>. Hence, the ASSR has found itself useful in many applications ranging from hearing  
11 assessments<sup>6-8</sup> to attention research<sup>9-12</sup> and schizophrenia<sup>13-14</sup>.

12 However, questions such as what brain regions contribute to generating an ASSR, how an ASSR is influenced by cognitive  
13 processes and individual auditory expertise, or how the ASSR changes during and after a stimulus have not been fully explored.  
14 One popular theory regarding how the ASSR is generated suggests that the ASSR is a result of phase-locking between the  
15 envelope of the ongoing auditory stimulus and neuronal oscillations (hereafter referred to as the "ON ASSR"). This theory is  
16 dubbed the 'Entrainment Hypothesis', and is considered to give rise also to an extended "ringing" of the ASSR even after  
17 stimulus removal<sup>4, 15-16</sup>. While the presence of such post-stimulus ringing (hereafter referred to as the "OFF ASSR") has been  
18 observed experimentally, the response characteristics and its underlying sources have not yet been examined. Given that the  
19 dominating view on cortical ASSR sources has been that the ASSR predominantly stem from temporal auditory cortices, the  
20 lack of research on the OFF ASSR may possibly reflect that researchers have assumed that it is a remnant activity leftover from  
21 a decaying ASSR with the same neural origins, and therefore should exhibit the same properties as the ASSR when the stimulus  
22 was present (ON ASSR).

23 Although this assumption is not unreasonable, more evidence is needed to substantiate it and clarify the association between  
24 the OFF ASSR and ON ASSR. This is an important step to achieving a fuller picture of the ASSR phenomenon and how to  
25 effectively utilize it. Recent data indicates that the ASSR involves more extensive cortical sources than previously believed,  
26 engaging both parietal and frontal cortices in addition to the temporal auditory cortices<sup>9</sup>. It is however not yet known what  
27 sources are engaged during the OFF ASSR period, and whether these sources differ from the ON ASSR. Furthermore, although  
28 several publications have shown that the ASSR power is modulated by selective auditory attention<sup>11-12</sup>, less is known about  
29 how the different cortical sources contribute to this modulation, and virtually nothing is known regarding whether selective  
30 attention influences the OFF ASSR per se. Finally, it remains unknown as to whether the ASSR itself or its modulation by  
31 selective attention is influenced by auditory experience and training such as musical expertise. Previous research has  
32 demonstrated that the neural correlates of auditory information processing vary with musical expertise<sup>17-18</sup>, and that the ASSR  
33 may be affected by age-related experience factors<sup>19</sup>.

34 In this study, our primary objective is to characterize and compare the ON and OFF ASSR in terms of their sensitivity to (i)  
35 stimulus physical properties such as volume and carrier frequency ( $f_c$ ), (ii) selective auditory attention, (iii) musicality, as well  
36 as their respective (iv) cortical source distributions. As a secondary objective, we will also follow-up on our recent work which  
37 showed that the ASSR is enhanced by selective auditory attention to a single melody stream presented within a mixture of  
38 three<sup>9</sup>. In the present study, we will extend this finding further by localizing the cortical areas of ASSR attentional modulation  
39 via statistical testing for each of the frontal, parietal, temporal and insular lobes. A priori, we hypothesize, based on our previous  
40 findings<sup>9</sup>, that all of these areas exhibit ASSR attentional enhancement. In addition, we will also explore the relationship

41 between ASSR attentional modulation and musicality at each of these locations. Using MEG, we recorded the ON and OFF  
42 ASSRs from 29 adults with varying degrees of musical sophistication during a melody tracking task in which selective attention  
43 was shifted between different amplitude-modulated melody streams. Alongside sensor-space analyses, our source analysis  
44 adopted a minimum-norm estimate<sup>20</sup> (MNE) distributed modelling approach to produce individual source estimates of these  
45 ASSRs.

## 46 2. Materials and Methods

### 47 2.1 Participants

48 A total of 29 participants with normal hearing volunteered to take part in the experiment (age 18 – 49 years, mean age =  
49 28.6, SD = 6.2; 9 female; 2 left-handed). The experiment was approved by the Regional Ethics Review Board in Stockholm  
50 (Dnr: 2017/998-31/2). Both written and oral informed consent were obtained from all participants prior to the experiment. All  
51 participants received a monetary compensation of SEK 600 (~ EUR 60).

### 52 2.2 The Goldsmith Musical Sophistication Index(Gold-MSI) self-report questionnaire

53 A subset of the Gold-MSI self-report questionnaire (v1.0)<sup>21-22</sup> containing 22 questions was used to estimate each  
54 participant's level of musical sophistication. These include all questions from the musical training and singing abilities  
55 subscales, selected questions from the perceptual abilities and active engagement subscale, but no questions from the emotions  
56 subscale. The MSI quantifies a participant's level of musical skills, engagement and behaviour in multiple facets, and is ideal  
57 for testing amongst a general population that includes both musicians and non-musicians. Across all 29 participants, we obtained  
58 MSI scores ranging from 40 - 132, out of a maximum score of 154. A copy of the questionnaire used for this study can be found  
59 in the Supplementary Information (S1).

### 60 2.3 Experimental Task: Melody Development Tracking task

61 Participants performed the Melody Development Tracking (MDT) task according to the protocols in our previous study<sup>9</sup>,  
62 with the slight difference that a wider pitch separation was employed between the three frequency-tagged melody streams.  
63 Participants were presented with three melody streams of different pitch (i.e.  $f_c$ ) ranges, i.e. the Bottom voice, Middle voice,  
64 and Top voice. All three voices consisted of even (isochronous) melodic streams, but the three voices were slightly phase  
65 shifted relative to one another, so that the tones of each voice occurred separately in time as illustrated in Figure 1. The order  
66 of the tones was either Bottom-Middle-Top or the reverse, with the order balanced across trials. Before each melody began,  
67 participants were instructed to direct their attention exclusively to either the Bottom voice or the Top voice. When the melody  
68 stopped at a random time point, participants were asked to report the latest direction of pitch change between the two most  
69 recent notes in the attended voice (either *falling*, *rising* or *constant* pitch) with a button press (see Fig. 1). In total, 28 such  
70 responses were collected over approximately 15 minutes of MEG recording time for each participant.

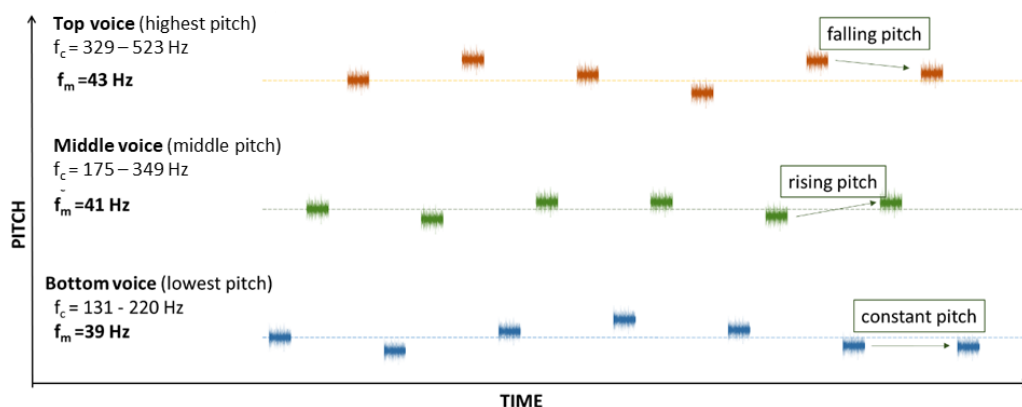

72 **Figure 1.** The Melody Development Tracking (MDT) task. Participants listened to three melody streams while attending to either the Bottom  
73 voice or the Top voice following an auditory cue. When the melody stopped, participants reported the latest direction of pitch change  
74 between the two most recent notes in the attended voice (i.e. falling, rising or constant pitch as illustrated). The three melody streams were  
75 presented separately in time, starting from Bottom to Top (as shown in figure) or its reverse. The respective  $f_c$  (pitch) range and  $f_m$  of each  
76 stream are indicated above.

#### 77 2.4 Stimuli

78 Each of the three voices consists of a stream of 750 ms long sinusoidal tones of  $f_c$  between 131 – 329 Hz generated using  
79 the Ableton Live 9 software (Berlin, Germany). The tones that make up each voice stream were randomly-selected from the C  
80 major harmonic scale, allowing for repetition but limited to notes within their respective  $f_c$  range namely, the Bottom voice:  
81 131 - 220 Hz, Middle voice 175 – 349 Hz, and Top voice 329 – 523 Hz. The minimum pitch difference between voices was 3  
82 semitones. At the onset and offset of each tone, we introduced a 25 ms amplitude fade-in and fade-out to avoid audible  
83 compression clicks. These tones were then amplitude-modulated sinusoidally in Ableton Live 9 using  $f_m$  at 39 (Bottom voice),  
84 41 (Middle voice), and 43 (Top voice) Hz, and a modulation depth of 100% to achieve maximum ASSR power<sup>8</sup>. Each tone is  
85 followed by 250 ms of silence before the next tone was played. The duration of melody presentation was randomized to be  
86 between 9 – 30 seconds long to reduce predictability of the stop point and thereby maintain high attention throughout the  
87 melody. At the stop point, the direction of pitch change was unique to each voice. The relative volume of each voice was  
88 adjusted to account for differences in subjective loudness for different frequency ranges<sup>32</sup>. The respective settings for the  
89 Bottom, Middle and Top voices were 0 dB, -6 dB and -10 dB, resulting in their raw volume decreasing in the same order. The  
90 stimulus was presented identically via ear tubes to both ears with the final average raw volume calibrated to 75 dB SPL per ear,  
91 subjected to individual comfort level, using a soundmeter (Type 2235, Brüel & Kjær, Nærum, Denmark).

#### 92 2.5 Behavioural data analysis

93 To assess response accuracy in the MDT task, mean task performance scores (number of correct responses out of 28 total  
94 responses) were calculated across all conditions separately for each participant.

#### 95 2.6 Data Acquisition

96 MEG measurements were carried out using a 306-channel whole-scalp neuromagnetometer system (Elekta TRIUX™,  
97 Elekta Neuromag Oy, Helsinki, Finland). Data was recorded at a 1 kHz sampling rate, on-line bandpass filtered between 0.1-  
98 330 Hz and stored for off-line analysis. Horizontal eye-movements and eye-blinks were monitored using horizontal and vertical  
99 bipolar electrooculography electrodes. Cardiac activity was monitored with bipolar electrocardiography electrodes attached  
100 below the left and right clavicle. Internal active shielding was active during MEG recordings to suppress electromagnetic  
101 artefacts from the surrounding environment. In preparation for the MEG measurement, each participant's head shape was  
102 digitized using a Polhemus FASTRAK system. The participant's head position and head movement were monitored during  
103 MEG recordings using head-position indicator (HPI) coils. Anatomical magnetic resonance images (MRIs) were acquired using  
104 hi-res Sagittal T1 weighted 3D IR-SPGR (inversion recovery spoiled gradient echo) images by a GE MR750 3 Tesla scanner,  
105 with the following pulse sequence parameters: 1 mm isotropic resolution, FoV 240 × 240 mm, acquisition matrix: 240 × 240,  
106 180 slices 1 mm thick, bandwidth per pixel=347 Hz/pixel, Flip Angle=12 degrees, TI=400 ms, TE=2.4 ms, TR=5.5 ms resulting  
107 in a TR per slice of 1390 ms.

#### 108 2.7 Data Processing

109 The acquired MEG data was pre-processed using MaxFilter (-v2.2)<sup>33-34</sup>, and subsequently analysed and processed using the  
110 Fieldtrip toolbox<sup>35</sup> in MATLAB (Version 2016a, Mathworks Inc., Natick, MA), as well as the MNE-Python software<sup>36</sup>. Cortical  
111 reconstruction and volumetric segmentation of all participants' MRI was performed with the FreeSurfer image analysis suite<sup>37</sup>.

### 112 2.7.1 Pre-Processing

113 MEG data was MaxFiltered<sup>23-24</sup> by applying temporal signal space separation (tSSS) to suppress artefacts from outside the  
114 MEG helmet and to compensate for head movement during recordings, before being transformed to a default head position.  
115 The tSSS had a buffer length of 10 s and a cut-off correlation coefficient of 0.98. The continuous MEG data were divided into  
116 1 s-long epochs from stimulus onset (i.e. onset of each individual note). Epochs were then visually inspected for artefacts and  
117 outliers with high variance were rejected using *ft\_rejectvisual*<sup>35</sup>. After cleaning, the remaining approximately 70 % of all epochs  
118 were kept for further analyses. The data was divided into six experimental conditions, consisting of epochs (~100 per condition)  
119 for each of the three voices (Bottom, Middle, Top) under instructions to attend the Bottom voice or Top voice, respectively,  
120 i.e. i) Bottom voice × Attend Bottom (“Bottom-Attend”), ii) Bottom voice × Attend Top (“Bottom-Unattend”), iii) Top voice  
121 × Attend Top (“Top-Attend”), iv) Top voice × Attend Bottom (“Top-Unattend”), v) Middle voice × Attend Bottom, vi) Middle  
122 voice × Attend Top.

### 123 2.7.2 Sensor-space analysis of MEG data

124 One participant was excluded due to lower-than-chance performance in the behavioural task, resulting in 28 participants for  
125 all sensor-space MEG analyses. We carried out sensor-space analysis on the cleaned MEG epochs to extract the ASSR power  
126 for each of the six conditions. Firstly, a 30 – 50 Hz bandpass filter was applied to the epochs which were then averaged per  
127 condition, resulting in the *timelocked* ASSR. The *timelocked* ASSR was then divided into two segments – an ON segment  
128 between 200 – 700 ms corresponding to the relatively stable part of the ASSR, and an OFF segment between 800 – 950 ms  
129 during which no auditory stimulus was present. Each of these segments were zero-padded to 1 s before applying a fast Fourier  
130 transform (hanning-tapered, frequency resolution = 1 Hz) to acquire separate power spectra for the ON and OFF ASSRs (Fig.  
131 2). The ASSR power spectra were further averaged across all gradiometer sensors, after collapsing data from orthogonal planar  
132 gradiometers, to give the average gradiometer data per participant. Gradiometer sensors were selected for analysis as they are  
133 generally less noisy compared to magnetometers. From the ON and OFF power spectra, the maximum power across all  
134 frequencies was extracted accordingly for each of the six conditions to give the mean ASSR power per condition. This  
135 corresponds to the power at  $f_m$  for the ON condition (defined as 39, 41, and 43 Hz for the Bottom, Middle and Top voices  
136 respectively). As for the OFF ASSR, the maximum frequency value strays slightly from  $f_m$  as the decaying ASSR oscillation  
137 slows down, but is still within the expected value of around ~40 Hz. For the analysis concerning ASSR power changes across  
138 voices (i.e. due to volume and  $f_c$ ), the Attend Bottom and Attend Top data were combined and averaged within each voice,  
139 resulting in the mean ASSR power per voice regardless of attention condition. Finally, the mean ASSR power was converted  
140 to the base 10 logarithmic scale [ $\lg(\text{power})$ ] to achieve a more normal distribution across participants for statistical analysis.  
141 Pearson’s correlation tests were used to investigate the relationship between  $\lg(\text{power})$  of the Middle voice (excluded in  
142 attention condition) and MSI for the ON and OFF ASSRs separately.

### 143 2.7.3 Source-space analysis of MEG data

144 In addition to the participant excluded due to less-than-chance performance in the behavioural task, a second participant was  
145 excluded due to unsuccessful MRI collection, resulting in a final sample of 27 participants for the source-space MEG analyses.  
146 We used a minimum-norm estimate<sup>20</sup> (MNE) distributed source model containing 20484 dipolar sources on the cortical surface  
147 to produce individual-specific anatomical layouts of the ASSR sources. These models were generated by inputting the ON and  
148 OFF sensor-space *timelocked* ASSR data into the MNE computation, before applying a Welch PSD estimation with zero-padding  
149 to 1 s (Hanning windowed, frequency resolution 1 Hz). Subsequently, the individual MNE solutions were morphed to a common  
150 fsaverage template.

151



#### 152 2.7.4 Source Pattern for ON vs OFF ASSR

153 We used the unattended Middle voice as a localizer to identify source distribution patterns of the ASSR across the cortex  
154 for the ON and OFF conditions. For each subject's MNE solution, the power at each vertex was normalized by division over  
155 the maximum power across all 20484 vertices at 41 Hz, corresponding to the  $f_m$  of the Middle voice. This expresses the power  
156 of all sources as a fraction of the maximum power ASSR source, thereby correcting for individual power differences and  
157 allowing for subsequent averaging across subjects. The resultant MNE source pattern at 41 Hz represents the group overall  
158 distribution of the ASSR sources for ON and OFF.

#### 159 2.7.5 Location of the ON ASSR attentional enhancement and correlates with musical sophistication

160 Ten ROIs per hemisphere, across four lobes, were selected based on previous results<sup>9</sup> showing that these ROIs contained  
161 spatial clusters which overall drive the ASSR attentional effect in a cluster permutation test. It should be noted, however, that  
162 the permutation test we applied only indicates an overall effect in the whole set of clusters, and not that the effect is present in  
163 each individual cluster. Here, we follow-up the question of the location of ASSR attentional enhancement, using a more  
164 confirmatory approach with the same ROIs as a priori target locations. The ten ROIs are the middle frontal gyrus, inferior  
165 frontal gyrus, orbital gyrus, precentral gyrus, superior temporal gyrus, middle temporal gyrus, posterior superior temporal  
166 sulcus, inferior parietal lobule, postcentral gyrus and insular gyrus. These ROIs are demarcated and classified into lobes  
167 according to the Brainnetome Atlas<sup>25</sup> (see Fig. 5). Using the ON data, a MNE solution was computed for each Attend  
168 (Attend/Unattend) condition of the Bottom and Top voices (as the Middle voice was always unattended) per participant, and  
169 the ASSR power at  $f_m$  was extracted at 39 Hz and 43 Hz respectively. Next, all vertices within each ROI were averaged to give  
170 a median power value per ROI  $\times$  Voice  $\times$  Attend condition. The attentional modulation per ROI was expressed as a ratio  
171 between the Attend and Unattend conditions for each voice, and then averaged across the two voices. As a data reduction step,  
172 the ten ROIs were categorized into their respective lobes and averaged within the lobe (except for the insular lobe which only  
173 contained a single ROI), resulting in a total of eight datasets, each representing attentional modulation in one of the four lobes  
174 in the left or right hemisphere. As before, the Attend:Unattend ratio was converted to the base 10 logarithmic scale (lgAU) to  
175 achieve a more normal data distribution for statistical testing. The difference between lgAU and zero (since lgAU is equal to  
176 zero when the Attend:Unattend ratio is 1) was tested with one-tailed t-tests for positive attentional enhancement at a critical  
177 level of 0.05 with false discovery rate (FDR) correction over 8 tests using the Benjamini-Hochberg<sup>26</sup> procedure. Additionally,  
178 Pearson's correlations between lgAU and MSI were computed to quantify the relationship between ASSR attentional  
179 enhancement and musical sophistication at each lobe.

### 180 3. Results

#### 181 3.1 MEG results

##### 182 3.1.1 Primary objective: Comparing the characteristics of the ON and OFF ASSR

183 For each subject, we computed the power spectra for the ON and OFF segments from the *ASSR\_timelocked* data (see Fig. 2  
184 for illustrative description) and compared them in terms of (i) voice differences (i.e. the stimulus volume and  $f_c$ ), (ii) selective  
185 attention, (iii) musicality (using the MSI), and (iv) cortical source distributions. Parts (i) – (iii) were obtained from the averaged  
186 sensor-level data, while part (iv) was addressed by MNE source analysis.

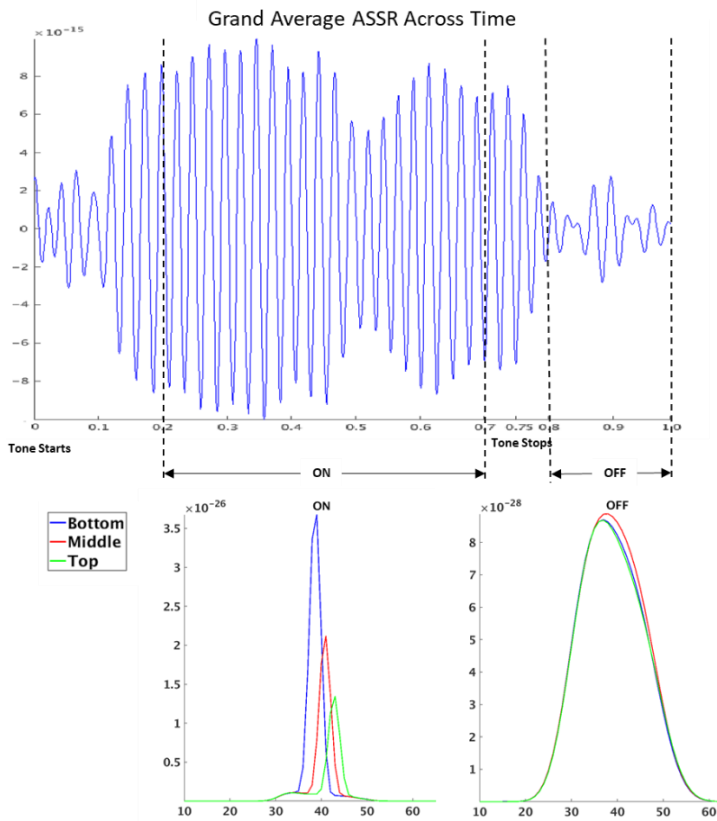

187

188

189

190

191

192

193

194

195

**Figure 2.** The ON and OFF ASSR power spectra. For each participant, the ON ASSR was obtained from a fast Fourier transform of the 200 – 700 ms time segment of the *timelocked* ASSR (top row), during which the tone stimulus was continuously present. Similarly, the OFF ASSR was similarly obtained from that of the 800 – 950 ms time segment, which occurred after the tone stimulus has stopped at 750 ms. The corresponding ON and OFF ASSR power spectra are shown in the bottom row. For the ON ASSR, the peak power occurred precisely at the modulation frequencies 39 (Bottom voice), 41 (Middle voice) and 43 Hz (Top voice). The OFF ASSR had wider, but clear, peaks at values lower than  $f_m$ , albeit still close to 40 Hz, owing largely to the slowdown of the decaying ASSR. The across-subject grand average *timelocked* ASSR and frequency spectra are shown for illustrative purposes.

196

(i) *ASSR power across voices*

197

198

199

200

201

202

203

204

205

206

A repeated-measures ANOVA was used to test the differences in ASSR power across voices (Bottom/Middle/Top) and segments (ON/OFF). The analysis showed a significant main effect of segment ( $F[1, 27]= 357.5, p < 0.001$ ), as well as voice ( $F[2, 54]= 62.2, p < 0.001$ ). As can be seen in Figure 3, the ON segment (mean  $\lg(\text{power})$  across voices = -26.2) had ASSR responses of higher power than the OFF (mean  $\lg(\text{power})$  across voices = -27.4) segment. There was also a significant interaction between voice and segment ( $F[2, 54]= 75.3, p < 0.001, \text{partial } \eta^2 = 0.736$ ). Post-hoc Tukey tests revealed that there were significant differences between all three voices for the ON ( $p < 0.001$ , Bonferroni-corrected over 6 tests) but not for the OFF segment (minimum  $p$  value = 0.55, uncorrected). The decrease in ASSR power from Bottom to Middle to Top voice was expected since the sound volume was decreased in the same order across voices (as described under Methods)<sup>1</sup>. Figure 3 plots the  $\lg(\text{power})$  per voice for ON and OFF ASSRs, averaged across subjects. The corresponding ASSR powers in  $\text{T}^2/\text{m}^2$  are computed and displayed in the figure.



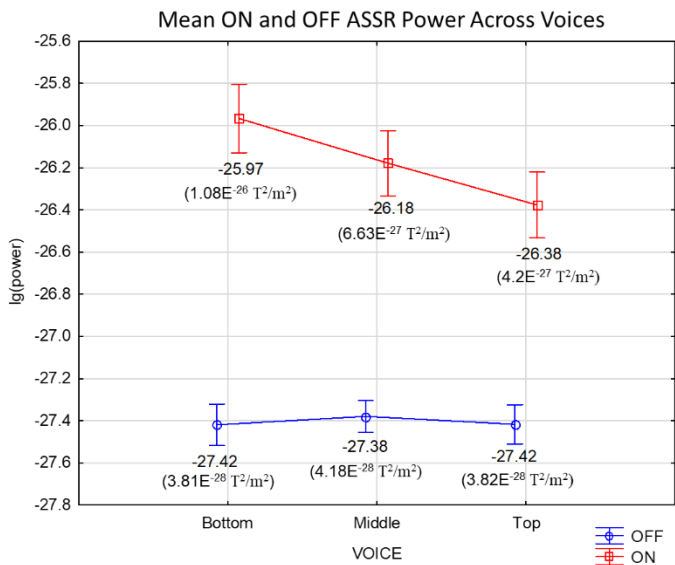

207

208

209

210

211

212

213

**Figure 3.** ON and OFF ASSR power across voices. Across-subject mean ON ASSR power decreases in the order Bottom-Middle-Top, as volume falls and  $f_c$  rises, whereas such a difference is hardly noticeable for the OFF ASSR. The lg(power) differences is significant ( $p < 0.001$ ) between all voices for ON and not significant between any voice for OFF in the post hoc Tukey tests (corrected). Furthermore, the ON ASSR displayed approximately 10 – 30 times stronger power than the OFF ASSR for all three voices. The corresponding ASSR powers in T<sup>2</sup>/m<sup>2</sup>, calculated directly from lg(power), are shown in parenthesis below the mean lg(power) values. Vertical bars denote 0.95 confidence intervals.

214

(ii) *ASSR power and selective attention*

215

216

217

218

219

220

A separate repeated-measures ANOVA was used to test the modulation in ASSR power by selective attention (comparing Attend/Unattend conditions), voices (Bottom/Top) and segments (ON/OFF). As before, there was a significant main effect of segment ( $F[1, 27] = 280.7, p < 0.001$ ), as well as voice ( $F[1, 27] = 118.2, p < 0.001$ ). There was no main effect of attention ( $F[1, 27] = 10.8, p = 0.29$ ). The analysis revealed a significant interaction between attention conditions and segment ( $F[1, 27] = 10.8, p = 0.0028, \text{partial } \eta^2 = 0.285$ ), and a post-hoc Tukey tests revealed significant differences between Attend and Unattend only in the ON time segment ( $p = 0.012$ ) and not the OFF time segment ( $p = 0.58$ ).

221

(iii) *ASSR power and musical sophistication*

222

223

224

Pearson's correlation tests were run to quantify the relationship between ASSR [lg(power)] and MSI. For this analysis, only the Middle voice was tested for significant correlations with MSI. The results show a significant positive correlation between ASSR and MSI for the ON ( $r = 0.40, p = 0.036, R^2 = 0.16$ ; See Fig. 6d) but not the OFF ASSR ( $p = 0.58$ ).

225

(iv) *Cortical ASSR source distribution*

226

227

228

229

Using the unattended Middle voice as a localizer, we identified source distribution patterns of the ASSR across the cortex for the ON and OFF conditions. MNE source estimates show that the ON ASSR sources are localized primarily to the temporal auditory regions, whereas the OFF ASSR sources appear to be localized mainly to the frontal cortices. Figure 4 illustrates the cortical distribution of the ASSR signal for ON and OFF, averaged across all participants.

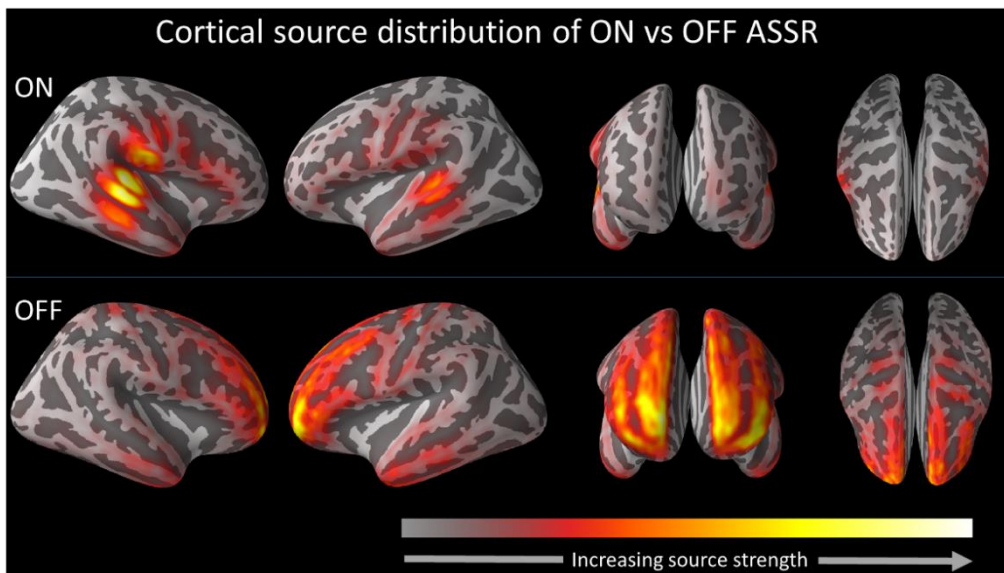

230

231

232

233

234

235

236

237

238

239

240

241

242

243

244

245

246

247

248

249

250

251

252

253

254

**Figure 4.** Comparison of the Middle voice cortical source distributions between ON (Top) and OFF (Bottom) ASSR. The across-subject grand average cortical source distribution maps at the peak Middle voice frequency are displayed. For the ON ASSR, the peak frequency is the  $f_m$  of 41 Hz, whereas for the OFF ASSR, it occurs slightly below  $f_m$  at 40 Hz as the oscillation slows down. The strongest ON ASSR sources were found in the primary and secondary auditory cortices within the temporal lobe. On the contrary, the strongest OFF ASSR sources resided mainly in the frontal cortices. Each map is normalized to its individual maximum source power (vertex-level) and scaled according to the colour bar shown. Orientation views from left to right: right lateral, left lateral, frontal, top.

### 3.1.2 Secondary objective: cortical source locations of ASSR attentional enhancement

#### (i) Attentional enhancement of ASSR power across lobes and hemispheres

Our second aim was to independently test if there was a significant enhancement of ASSR power due to selective attention in each of four lobes (frontal, temporal, parietal, insular) for two (left and right) hemispheres. Based on previous results from our group<sup>9</sup>, we hypothesized that the ASSR power in each of these areas would be significantly enhanced by selective attention. Figure 5 illustrates the across-subject grand average percentage attentional enhancement per ROI, categorized into their corresponding lobes by coloured borders (Green: Frontal, Blue: temporal, Magenta: parietal, White: Insular). Each ROI is labelled according to column 2 (in parenthesis) of the accompanying table on the right. The exact grand average attentional enhancement values corresponding to each ROI range from 9 – 50 % and can be found in the supplementary information (S1). The base 10 logarithmic of the Attend:Unattend ASSR power ratio [ $\lg(\text{AU})$ ] was computed per lobe for each subject and used as a measure for attentional modulation. As hypothesized, the results from the t-tests yielded significant ASSR attention enhancement in all 8 lobes (FDR-corrected). The p values for each of these tests are displayed in the table on the right of Figure 5. The percentage enhancement values presented are back-calculated from the subject-median  $\lg(\text{AU})$  values to aid in interpretation. Alongside, Table 4 also shows the ROIs, with their corresponding label numbers in Figure 5, that comprise each lobe. A repeated-measures ANOVA using the  $\lg(\text{ADU})$  values reported no main effect of hemisphere ( $F[1, 26]= 3.0, p = 0.096$ ) or lobe ( $F[1, 26]= 1.6, p = 0.19$ ), indicating that there was no significant difference in attentional enhancement between hemispheres or lobes.

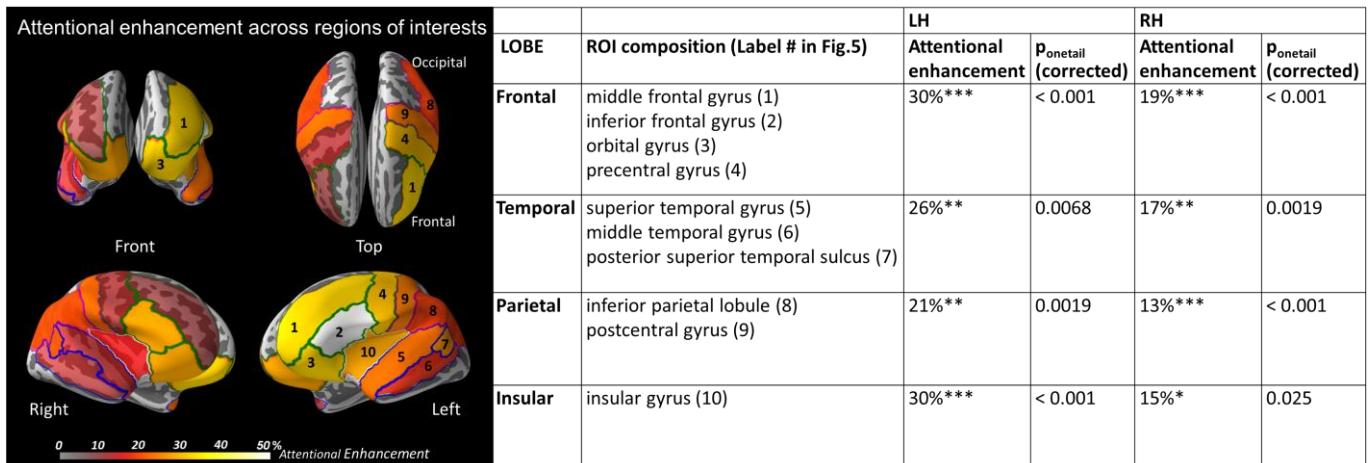

255

256

257

258

259

260

261

262

**Figure 5.** Across-subject grand average attentional enhancement across cortical lobes and regions of interests. (Left) The percentage increase due to selective attention is illustrated across the four lobes, with the constituent ROIs of each lobe demarcated in coloured lines (Green: Frontal, Blue: temporal, Magenta: parietal, White: Insular), and numbered according to column 2 (in parenthesis) of the table on the right. Colour bar is scaled to the percentage amount of attentional enhancement per ROI. (Right) The accompanying table displays the average attentional enhancement per lobe, back-calculated from  $\lg(\text{AU})$  values obtained from averaging across the ROIs that make up each lobe (columns 1 and 2). ALL FDR-corrected p-values from the one-tailed t-tests of  $\lg(\text{AU})$  values are reported in columns 4 and 6.  $p < 0.001$ \*\*\*,  $p < 0.01$ \*\* ,  $p < 0.05$ \*

263

(ii) *The influence of musical sophistication on extent of ASSR attentional modulation*

264

265

266

267

268

269

270

Finally, we investigated the relationship between musical sophistication and the degree of ASSR modulation from selective attention. By correlating individual MSI and  $\lg(\text{AU})$  values separately for each lobe and hemisphere, we found that the extent of ASSR attentional modulation in the parietal lobes (but not in the other lobes) was positively correlated with MSI: Left parietal lobe ( $r(25) = 0.39$ ,  $p = 0.043$ ,  $R^2 = 0.15$ ) and Right parietal lobe ( $r(25) = 0.44$ ,  $p = 0.022$ ,  $R^2 = 0.19$ ). With reference to Figure 6a and 6b, higher MSI was associated with a larger degree of ASSR attentional enhancement following selective attention. Figure 6 also depicts complementary correlations between MSI and performance (Fig. 6c), as well as between MSI and the ON ASSR power (Fig. 6d).

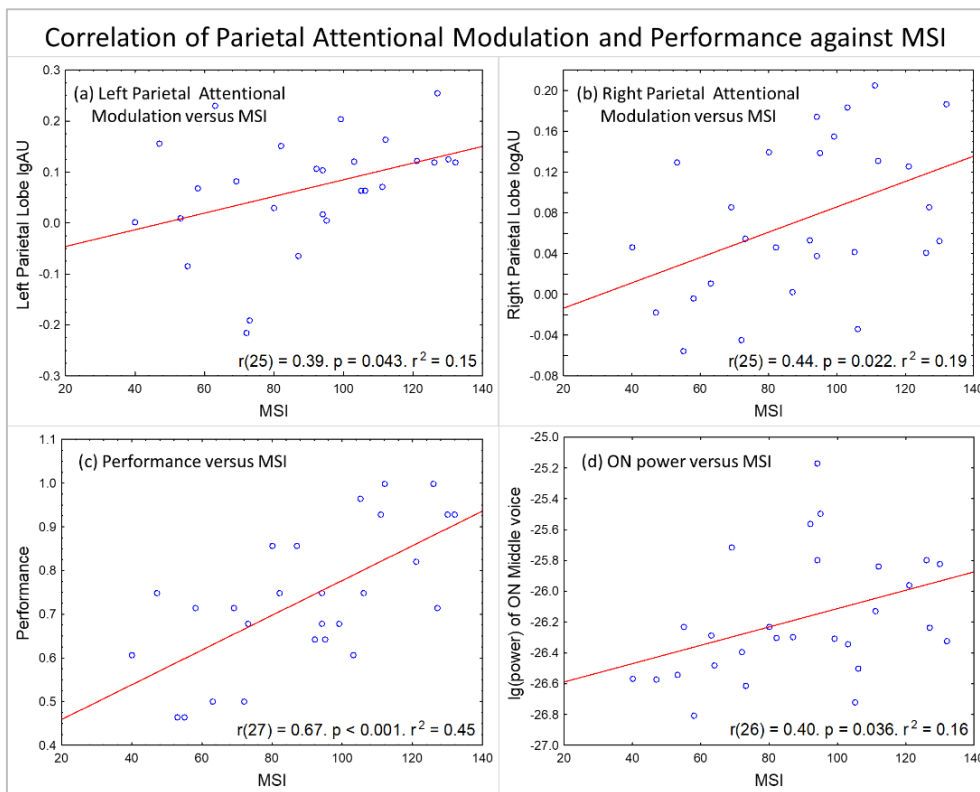

271

272

**Figure 6.** Correlation of left and right parietal attentional modulation and performance against MSI. Pearson's  $r$ ,  $R^2$  and  $p$ -values are indicated directly below each graph.

273

274

(a & b) The attentional modulation across 27 participants correlates positively with MSI at the Left ( $r(25) = 0.39, p = 0.043, R^2 = 0.15$ ) and Right ( $r(25) = 0.44, p = 0.022, R^2 = 0.19$ ) parietal lobes.

275

276

(c) Performance is positively correlated with MSI across all 29 participants ( $r(27) = 0.67, p < 0.001, R^2 = 0.45$ ).

277

(d) ASSR power of the Middle voice is positively correlated with MSI for the ON segment ( $r = 0.40, p = 0.036, R^2 = 0.16$ ) across 28 participants.

278

279

### 3.1 Behavioural results

280

As mentioned above, results from the MDT task showed that 28 out of 29 participants performed significantly above the chance level of 33% ( $M = 71\%$ ,  $SD = 18.3\%$ ;  $t(29) = 11.1, p_{\text{two-tailed}} < 0.001$ ). These performance scores were positively correlated with MSI ( $r(27) = 0.67, p < 0.001, R^2 = 0.45$ ) (Fig. 6c), illustrating the sensitivity of the MDT task to individual level of musical sophistication.

281

282

283

284

## 4 Discussion

285

In this MEG study, we characterized the cortical ASSR that is generated during (ON) and after (OFF) the presentation of an amplitude-modulated stimulus using a task involving selective auditory attention to melody streams. We demonstrated that the ON and OFF ASSRs exhibit differences in their sensitivity to (i) stimulus volume and carrier frequency, (ii) selective attention and (iii) musical sophistication, as well as in their respective (iv) cortical source distributions. Furthermore, we statistically confirmed that the ASSR is enhanced by selective attention at cortical sources in each of the frontal, temporal, parietal and insular lobes. The following section discusses the key insights of this study.

286

287

288

289

290

291

### 4.1 ON and OFF ASSR have radically different characteristics

292

A novel and important finding in this study is that the OFF and ON ASSRs exhibited starkly different cortical source distributions, with the OFF sources mainly localized to the frontal cortex, while the strongest ON sources were localized to the temporal auditory cortices. While the presence of ASSR sources in the temporal<sup>27-29</sup> and frontal<sup>30-32</sup> cortices is in accordance

293

294

295 with current literature and previous work from our group<sup>9</sup>, the discovery that frontal sources contributed to most of the OFF  
296 ASSR signal power was surprising and unprecedented. Moreover, the results also showed that the OFF and ON ASSRs  
297 exhibited different sensitivities to experimental factors and stimulus properties. The ON ASSR, on one hand, was modulated  
298 by several factors: It clearly decreased in power across voices from the Bottom to Top voice, reflecting the physical differences  
299 in volume and  $f_c$  between these voices. Furthermore, the ON ASSR power correlated positively with individual MSI, and  
300 significantly increased with selective attention.

301 On the other hand, the OFF ASSR<sub>r</sub> remained unaffected by the same factors, displaying very similar power levels across  
302 voices, and was neither affected by MSI nor selective attention. Collectively, these findings indicate that the ON and OFF  
303 ASSR reflect very different cortical processes, and that the OFF ASSR is not simply a ringing extension generated by the same  
304 sources that underlie the ON ASSR. While the ASSR itself reflects a neural representation of the periodic envelope of the  
305 stimulus, the pattern of results suggests that the brain progresses from a sensory processing and discrimination state (i.e.  
306 identifying and paying attention to a tone) driving the ON ASSR at the auditory cortices, to a different frontal-dominated state  
307 during which the periodic neural representation is still maintained (i.e. the OFF ASSR), but is not sensitive to external factors  
308 such as the stimulus' properties or to the perception of and attention to it. To the best of our knowledge, this is the first time  
309 any study has characterized the OFF ASSR, and the inclusion of this novel OFF ASSR adds a new dimension to the existing  
310 literature and potential uses of the ASSR for research, especially in the neuroscientific understanding of higher executive  
311 processing.

#### 312 *4.2 Selective attention enhances ASSR in multiple cortical lobes*

313 In agreement with our hypotheses, our results demonstrate a significant attentional enhancement of the ON ASSR in each  
314 of the frontal, temporal, parietal and insular lobes across both hemispheres. This enhancement was strongest in the frontal  
315 cortex, the established centre for attentional control<sup>33-35</sup>, with an average ASSR enhancement of 30 % and 19 % for the left and  
316 right hemispheres respectively. Compared to our previous work results<sup>9</sup> which suggested that the ASSR attentional enhancement  
317 can reach up to 80 % in frontal regions<sup>9</sup>, the current findings yielded substantially lower values. We believe that the differences  
318 between these studies can be explained by the thresholds used in the previous analysis to exclude vertices with weak ASSR  
319 power, whereas in the current analysis, the thresholding step was omitted to ensure that all ROIs contained sufficient vertices  
320 to be averaged at a single subject level. With the inclusion of vertices with little or no ASSR activity during averaging in this  
321 study, it is reasonable to expect the computed ASSR powers and attentional modulation to be diluted and thus reduced.

322 When discussing the individual signal contribution from different cortical areas, a critical point to consider is of course the  
323 degree of independence of these sources. With MEG (and EEG), field spread is an unavoidable aspect of the MEG signal. We  
324 addressed this issue in depth with point spread simulations in our previous study<sup>9</sup> demonstrating a clear independence from  
325 frontal and temporal sources. Similarly, the characteristics of the current results in Figure 5, suggest that the frontal sources are  
326 spatially separated, and thus likely to be independent from the parietal, temporal and insular sources. However, the ASSR  
327 sources in the latter 3 lobes often appear relatively close to one another, and in some cases even connected. It is then important  
328 to consider whether some of these sources arise from independent sources overlapping in space that cannot be differentiated by  
329 our source localization, or whether they are artefacts of signal spreading. Nonetheless, at the very least, the present results  
330 provide the first confirmatory evidence substantiating that selective attention enhances the ASSR power at the frontal cortex.

#### 331 *4.3 Musical sophistication is associated with an increase in ASSR power and attentional enhancement, especially in the* 332 *parietal cortex*

333 Our results also showed that that musical sophistication influences the ON ASSR, both the ASSR power itself, and the  
334 degree of its modulation from selective attention. Notably, the behavioural results showed a significant positive correlation  
335 between the MSI of participants and their performance scores in the MDT task ( $r = 0.67$ ), demonstrating the musical sensitivity

336 of the task. More importantly, our results show that the ASSR power correlates strongly with MSI scores ( $r = 0.40$ ). These  
337 results are in agreement with previous studies<sup>18, 36-37</sup> showing that neural processing of auditory stimuli are enhanced by musical  
338 abilities and experience, and may reflect an improvement in auditory skills owing to musical training. Additionally, we found  
339 a strong positive correlation between MSI and the degree of attentional enhancement in the left ( $r = 0.39$ ) and right ( $r = 0.44$ )  
340 parietal cortices with no such relationships to attentional enhancement in temporal and frontal cortices. In earlier studies<sup>38-40</sup>,  
341 parietal regions have been shown to exhibit sensitivity to musical experience and ability. This has been attributed to the fact  
342 that these regions play important roles for musical skill learning and performance. These evidences further strengthen the belief  
343 that musical experience is related to selective listening ability, a phenomenon which can be reflected in recorded neural signals  
344 like the ASSR. Speculatively, even better correlations between ASSR and musical experience may be achieved by using more  
345 musically-relevant or challenging experimental tasks with greater specificity and sensitivity to individual musical experiences  
346 and listening ability in future studies. For example, one could use more natural auditory stimuli like tones from a particular  
347 instrument that the musician participant has been trained in.

#### 348 *4.4 Conclusions*

349 To summarize, we demonstrated that ON and OFF ASSR are driven by different cortical sources — the frontal cortex for  
350 the OFF ASSR, and the temporal cortex for the ON ASSR. Furthermore, while the ON ASSR power was influenced both by  
351 physical stimulus features, selective attention and musicality, the OFF ASSR was not modulated by any of these factors,  
352 suggesting that the ON and OFF ASSRs stem from distinct neural states. Importantly, we have also confirmed that the ON  
353 ASSR exhibits significant attentional enhancement in the bilateral frontal, temporal, parietal and insular lobes, thus confirming  
354 our initial hypothesis. Moreover, we found that the degree of attentional enhancement correlated positively with individual  
355 musical sophistication scores specifically at the left and right parietal cortices, areas that are commonly associated with musical  
356 training<sup>38-40</sup>. Taken together, these findings deepen our understanding of the ASSR, while demonstrating it as a suitable and  
357 effective tool for analyses of higher cognitive processes such as music perception and selective attention.

#### 358 **Conflicts of Interests**

359 None

#### 360 **Acknowledgments**

361 Data for this study was collected at NatMEG, the National Facility for Magnetoencephalography (<http://natmeg.se>), Karolinska  
362 Institutet, Sweden. The NatMEG facility is supported by Knut and Alice Wallenberg Foundation (KAW2011.0207). This study  
363 was supported by the Swedish Foundation for Strategic Research (SBE 13-0115).



364 **References**

- 365 1. Ross, B.; Borgmann, C.; Draganova, R.; Roberts, L. E.; Pantev, C., A high-precision  
366 magnetoencephalographic study of human auditory steady-state responses to amplitude-modulated tones. *J*  
367 *Acoust Soc Am* **2000**, *108* (2), 679-91.
- 368 2. Regan, D., *Human brain electrophysiology : evoked potentials and evoked magnetic fields in science and*  
369 *medicine*. Elsevier: New York, 1989.
- 370 3. Picton, T. W.; John, M. S.; Dimitrijevic, A.; Purcell, D., Human auditory steady-state responses. *Int J Audiol*  
371 **2003**, *42* (4), 177-219.
- 372 4. Ross, B.; Picton, T. W.; Pantev, C., Temporal integration in the human auditory cortex as represented by  
373 the development of the steady-state magnetic field. *Hearing Research* **2002**, *165* (1), 68-84.
- 374 5. Lins, O. G.; Picton, T. W., Auditory steady-state responses to multiple simultaneous stimuli.  
375 *Electroencephalography and clinical neurophysiology* **1995**, *96* (5), 420-32.
- 376 6. Aimoni, C.; Crema, L.; Savini, S.; Negossi, L.; Rosignoli, M.; Sacchetto, L.; Bianchini, C.; Ciorba, A., Hearing  
377 threshold estimation by auditory steady state responses (ASSR) in children. *Acta Otorhinolaryngol Ital* **2018**, *38*  
378 (4), 361-368.
- 379 7. Luts, H.; Desloovere, C.; Kumar, A.; Vandermeersch, E.; Wouters, J., Objective assessment of frequency-  
380 specific hearing thresholds in babies. *International journal of pediatric otorhinolaryngology* **2004**, *68* (7), 915-26.
- 381 8. Luts, H.; Wouters, J., Hearing assessment by recording multiple auditory steady-state responses: the  
382 influence of test duration. *Int J Audiol* **2004**, *43* (8), 471-8.
- 383 9. Manting, C. L.; Andersen, L. M.; Gulyas, B.; Ullén, F.; Lundqvist, D., Attentional modulation of the auditory  
384 steady-state response across the cortex. *NeuroImage* **2020**, *217*, 116930.
- 385 10. Bidet-Caulet, A.; Fischer, C.; Besle, J.; Aguera, P.-E.; Giard, M.-H.; Bertrand, O., Effects of Selective  
386 Attention on the Electrophysiological Representation of Concurrent Sounds in the Human Auditory Cortex. *The*  
387 *Journal of Neuroscience* **2007**, *27* (35), 9252-9261.
- 388 11. Müller, N.; Schlee, W.; Hartmann, T.; Lorenz, I.; Weisz, N., Top-Down Modulation of the Auditory Steady-  
389 State Response in a Task-Switch Paradigm. *Frontiers in Human Neuroscience* **2009**, *3*, 1.
- 390 12. Bharadwaj, H.; Lee, A. K. C.; Shinn-Cunningham, B., Measuring auditory selective attention using frequency  
391 tagging. *Frontiers in Integrative Neuroscience* **2014**, *8* (6).
- 392 13. Kwon, J. S.; O'Donnell, B. F.; Wallenstein, G. V.; Greene, R. W.; Hirayasu, Y.; Nestor, P. G.; Hasselmo, M. E.;  
393 Potts, G. F.; Shenton, M. E.; McCarley, R. W., Gamma Frequency–Range Abnormalities to Auditory Stimulation in  
394 Schizophrenia. *Archives of General Psychiatry* **1999**, *56* (11), 1001-1005.
- 395 14. O'Donnell, B. F.; Vohs, J. L.; Krishnan, G. P.; Rass, O.; Hetrick, W. P.; Morzorati, S. L., Chapter 6 - The auditory  
396 steady-state response (ASSR): a translational biomarker for schizophrenia. In *Supplements to Clinical*  
397 *Neurophysiology*, Başar, E.; Başar-Eroğlu, C.; Özerdem, A.; Rossini, P. M.; Yener, G. G., Eds. Elsevier: 2013; Vol. 62,  
398 pp 101-112.

- 399 15. Santarelli, R.; Maurizi, M.; Conti, G.; Ottaviani, F.; Paludetti, G.; Pettorossi, V. E., Generation of human  
400 auditory steady-state responses (SSRs). II: Addition of responses to individual stimuli. *Hearing Research* **1995**, *83*  
401 (1), 9-18.
- 402 16. Basar, E.; Rosen, B.; Basar-Eroglu, C.; Greitschus, F., The associations between 40 Hz-EEG and the middle  
403 latency response of the auditory evoked potential. *The International journal of neuroscience* **1987**, *33* (1-2), 103-  
404 17.
- 405 17. Strait, D. L.; Slater, J.; O'Connell, S.; Kraus, N., Music training relates to the development of neural  
406 mechanisms of selective auditory attention. *Developmental Cognitive Neuroscience* **2015**, *12*, 94-104.
- 407 18. Fujioka, T.; Trainor, L. J.; Ross, B.; Kakigi, R.; Pantev, C., Musical training enhances automatic encoding of  
408 melodic contour and interval structure. *Journal of cognitive neuroscience* **2004**, *16*.
- 409 19. Poulsen, C.; Picton, T. W.; Paus, T., Age-related changes in transient and oscillatory brain responses to  
410 auditory stimulation in healthy adults 19-45 years old. *Cereb Cortex* **2007**, *17* (6), 1454-67.
- 411 20. Gramfort, A.; Luessi, M.; Larson, E.; Engemann, D.; Strohmeier, D.; Brodbeck, C.; Goj, R.; Jas, M.; Brooks,  
412 T.; Parkkonen, L.; Hämäläinen, M., MEG and EEG data analysis with MNE-Python. *Frontiers in Neuroscience* **2013**,  
413 *7* (267).
- 414 21. Müllensiefen, D.; Gingras, B.; Musil, J.; Stewart, L., Measuring the facets of musicality: The Goldsmiths  
415 Musical Sophistication Index (Gold-MSI). *Personality and Individual Differences* **2014**, *60* (Supplement), S35.
- 416 22. Müllensiefen, D.; Gingras, B.; Musil, J.; Stewart, L., The Musicality of Non-Musicians: An Index for Assessing  
417 Musical Sophistication in the General Population. *PLOS ONE* **2014**, *9* (2), e89642.
- 418 23. Taulu, S.; Kajola, M.; Simola, J., *Suppression of Interference and Artifacts by the Signal Space Separation*  
419 *Method*. 2004; Vol. 16, p 269-75.
- 420 24. Taulu, S.; Simola, J., Spatiotemporal signal space separation method for rejecting nearby interference in  
421 MEG measurements. *Physics in medicine and biology* **2006**, *51* (7), 1759-68.
- 422 25. Fan, L.; Chu, C.; Li, H.; Chen, L.; Xie, S.; Zhang, Y.; Yang, Z.; Jiang, T.; Laird, A. R.; Wang, J.; Zhuo, J.; Yu, C.;  
423 Fox, P. T.; Eickhoff, S. B., The Human Brainnetome Atlas: A New Brain Atlas Based on Connectional Architecture.  
424 *Cerebral Cortex* **2016**, *26* (8), 3508-3526.
- 425 26. Benjamini, Y.; Hochberg, Y., Controlling The False Discovery Rate - A Practical And Powerful Approach To  
426 Multiple Testing. *J. Royal Statist. Soc., Series B* **1995**, *57*, 289-300.
- 427 27. Schoonhoven, R.; Boden, C. J.; Verbunt, J. P.; de Munck, J. C., A whole head MEG study of the amplitude-  
428 modulation-following response: phase coherence, group delay and dipole source analysis. *Clinical*  
429 *neurophysiology : official journal of the International Federation of Clinical Neurophysiology* **2003**, *114* (11), 2096-  
430 106.
- 431 28. Steinmann, I.; Gutschalk, A., Potential fMRI correlates of 40-Hz phase locking in primary auditory cortex,  
432 thalamus and midbrain. *NeuroImage* **2011**, *54* (1), 495-504.
- 433 29. Lamminmäki, S.; Parkkonen, L.; Hari, R., Human Neuromagnetic Steady-State Responses to Amplitude-  
434 Modulated Tones, Speech, and Music. *Ear and Hearing* **2014**, *35* (4), 461-467.

- 435 30. Reyes, S. A.; Lockwood, A. H.; Salvi, R. J.; Coad, M. L.; Wack, D. S.; Burkard, R. F., Mapping the 40-Hz  
436 auditory steady-state response using current density reconstructions. *Hearing Research* **2005**, *204* (1), 1-15.
- 437 31. Reyes, S. A.; Salvi, R. J.; Burkard, R. F.; Coad, M. L.; Wack, D. S.; Galantowicz, P. J.; Lockwood, A. H., PET  
438 imaging of the 40 Hz auditory steady state response. *Hearing Research* **2004**, *194* (1), 73-80.
- 439 32. Farahani, E. D.; Goossens, T.; Wouters, J.; van Wieringen, A., Spatiotemporal reconstruction of auditory  
440 steady-state responses to acoustic amplitude modulations: Potential sources beyond the auditory pathway.  
441 *NeuroImage* **2017**, *148*, 240-253.
- 442 33. Cohen, R. A., Attention and the Frontal Cortex. In *The Neuropsychology of Attention*, Springer US: Boston,  
443 MA, 2014; pp 335-379.
- 444 34. Foster, J. K.; Eskes, G. A.; Stuss, D. T., The cognitive neuropsychology of attention: A frontal lobe  
445 perspective. *Cognitive Neuropsychology* **1994**, *11* (2), 133-147.
- 446 35. Plakke, B.; Romanski, L. M., Auditory connections and functions of prefrontal cortex. *Frontiers in*  
447 *neuroscience* **2014**, *8*, 199-199.
- 448 36. Musacchia, G.; Sams, M.; Skoe, E.; Kraus, N., Musicians have enhanced subcortical auditory and  
449 audiovisual processing of speech and music. *Proceedings of the National Academy of Sciences* **2007**, *104* (40),  
450 15894-15898.
- 451 37. Parbery-Clark, A.; Anderson, S.; Hittner, E.; Kraus, N., Musical experience strengthens the neural  
452 representation of sounds important for communication in middle-aged adults. *Front Aging Neurosci* **2012**, *4*, 30-  
453 30.
- 454 38. Rosenkranz, K.; Williamon, A.; Rothwell, J. C., Motorcortical excitability and synaptic plasticity is enhanced  
455 in professional musicians. *J Neurosci* **2007**, *27* (19), 5200-6.
- 456 39. Gärtner, H.; Minnerop, M.; Pieperhoff, P.; Schleicher, A.; Zilles, K.; Altenmüller, E.; Amunts, K., Brain  
457 morphometry shows effects of long-term musical practice in middle-aged keyboard players. *Frontiers in*  
458 *Psychology* **2013**, *4* (636).
- 459 40. de Aquino, M. P. B.; Verdejo-Román, J.; Pérez-García, M.; Pérez-García, P., Different role of the  
460 supplementary motor area and the insula between musicians and non-musicians in a controlled musical creativity  
461 task. *Scientific reports* **2019**, *9* (1), 13006.
- 462

463 **Supplementary Information**

464 *S1 Subset of MSI Questionnaire used in this study*

|                                                                                                                                                                   |
|-------------------------------------------------------------------------------------------------------------------------------------------------------------------|
| <i>Please select from:</i><br>1 Completely Disagree/ 2 Strongly Disagree/ 3 Disagree/ 4 Neither Agree nor Disagree/ 5 Agree/ 6 Strongly Agree/ 7 Completely Agree |
| 1. I spend a lot of my free time doing music-related activities.                                                                                                  |
| 2. If somebody starts singing a song I don't know, I can usually join in.                                                                                         |
| 3. I am able to judge whether someone is a good singer or not.                                                                                                    |
| 4. I usually know when I'm hearing a song for the first time.                                                                                                     |
| 5. I can sing or play music from memory.                                                                                                                          |
| 6. I am able to hit the right notes when I sing along with a recording.                                                                                           |
| 7. I find it difficult to spot mistakes in a performance of a song even if I know the tune.                                                                       |
| 8. I have trouble recognizing a familiar song when played in a different way or by a different performer.                                                         |
| 9. I have never been complimented for my talents as a musical performer.                                                                                          |
| 10. I am not able to sing in harmony when somebody is singing a familiar tune.                                                                                    |
| 11. I can tell when people sing or play out of time with the beat.                                                                                                |
| 12. I can tell when people sing or play out of tune.                                                                                                              |
| 13. When I sing, I have no idea whether I'm in tune or not.                                                                                                       |
| 14. I would not consider myself a musician.                                                                                                                       |
| 15. After hearing a new song two or three times, I can usually sing it by myself.                                                                                 |
| 16. I only need to hear a new tune once and I can sing it back hours later.                                                                                       |
| <i>Please select from the <u>underlined</u> options:</i>                                                                                                          |
| 17. I engaged in regular, daily practice of a musical instrument (including voice) for <u>0/1/2/3/4-5/6-9/10 or more</u> years.                                   |
| 18. At the peak of my interest, I practiced <u>0/0.5/1/1.5/2/3-4/5 or more</u> hours per day on my primary instrument.                                            |
| 19. I have had formal training in music theory for <u>0/0.5/1/2/3/4-6/7 or more</u> years                                                                         |
| 20. I have had <u>0/0.5/1/2/3-5/6-9/10 or more</u> years of formal training on a musical instrument (including voice) during my lifetime.                         |
| 21. I can play <u>0/1/2/3/4/5/6 or more</u> musical instruments                                                                                                   |
| 22. I listen attentively to music for <u>0-15 min/ 15-30 min/ 30-60 min/ 60-90 min/ 2 h/ 2-3 h/ 4 h or more</u> per day.                                          |
| <i>Additional question not used for computing MSI:</i>                                                                                                            |
| 23. The instrument I play best (including voice) is _____                                                                                                         |

465 *S2 Table of across-subject grand ASSR attentional enhancement per ROI*

| LOBE            | ROI (Label # in Fig.5)                 | Average Attentional Enhancement |     |
|-----------------|----------------------------------------|---------------------------------|-----|
|                 |                                        | LH                              | RH  |
| <b>Frontal</b>  | middle frontal gyrus (1)               | 31%                             | 9%  |
|                 | inferior frontal gyrus (2)             | 50%                             | 27% |
|                 | orbital gyrus (3)                      | 31%                             | 27% |
|                 | precentral gyrus (4)                   | 29%                             | 11% |
| <b>Temporal</b> | superior temporal gyrus (5)            | 22%                             | 12% |
|                 | middle temporal gyrus (6)              | 17%                             | 11% |
|                 | posterior superior temporal sulcus (7) | 25%                             | 19% |
| <b>Parietal</b> | inferior parietal lobule (8)           | 18%                             | 19% |
|                 | postcentral gyrus (9)                  | 23%                             | 22% |
| <b>Insular</b>  | insular gyrus (10)                     | 27%                             | 15% |

466
